# Supplementary material for: Ethnic Variations in the Levels of Bone Biomarkers (Osteoprostegerin, Receptor Activator of Nuclear Factor Kappa-Β Ligand and Glycoprotein Non-Metastatic Melanoma Protein B) in People with Type 2 Diabetes
Source: MDPI journal article supplement (doi:10.3390/biomedicines12051019), 2024-05-06
Supplement: s1 [file s1]

**Table S1.** Demographic distribution of the population stratified by ethnicity.

| <b>ARABS</b> |     |       | <b>ASIANS</b> |      |       |
|--------------|-----|-------|---------------|------|-------|
|              |     | %     |               |      | %     |
| EGYPTIAN     | 77  | 8.9   | AFGHANIS      | 8    | 0.8   |
| IRANIAN      | 18  | 2.1   | BANGLADE      | 28   | 2.7   |
| IRAQI        | 7   | 0.8   | INDIAN        | 504  | 48.9  |
| JORDANIA     | 51  | 5.9   | INDONESI      | 3    | 0.3   |
| KUWAITI      | 569 | 65.4  | JAPANIES      | 2    | 0.2   |
| LEBANESE     | 47  | 5.4   | NEPAL         | 4    | 0.4   |
| MORROCO      | 1   | 0.1   | PAKISTAN      | 90   | 8.7   |
| PALASTIN     | 5   | 0.6   | PHILIPIN      | 351  | 34.1  |
| SAUDI        | 2   | 0.2   | SRILANKA      | 26   | 2.5   |
| SUDANIAN     | 1   | 0.1   | VEITNAM       | 6    | 0.6   |
| SYRIAN       | 74  | 8.5   | OTHERS        | 8    | 0.8   |
| YEMAN        | 4   | 0.5   | TOTAL         | 1030 | 100.0 |
| OTHERS       | 14  | 1.6   |               |      |       |
| TOTAL        | 870 | 100.0 |               |      |       |
| MISSING      | 29  |       |               |      |       |

Reported as number of individuals of certain citizenship, and percentage within the ethnic category.
